# Supplementary material for: MH84 improves mitochondrial dysfunction in a mouse model of early Alzheimer’s disease
Source: PubMed Central journal article supplement (PMC5809956; doi:10.1186/s13195-018-0342-6), 2018-02-13

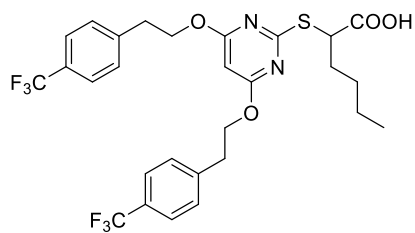

Chemical Formula:  $C_{28}H_{28}F_6N_2O_4S$

Exact Mass: 602,17

Molecular Weight: 602,59

MS (ESI-):

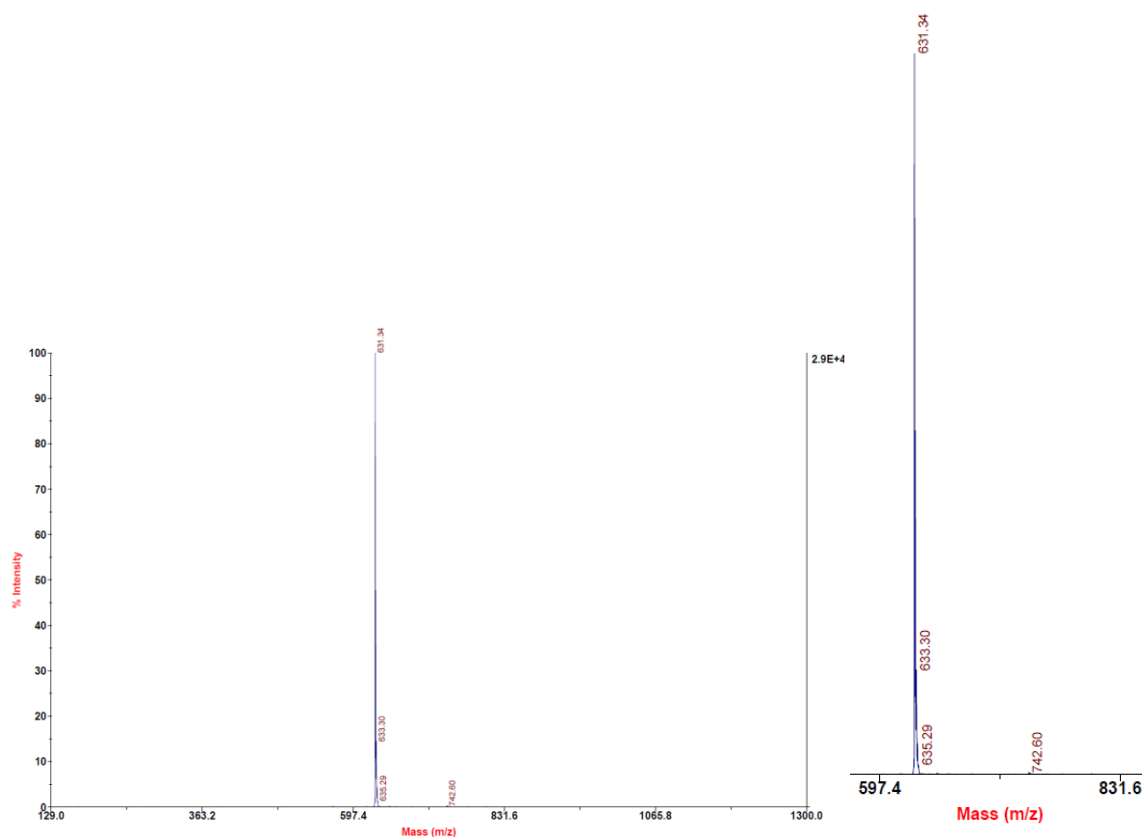

NMR:

$^1H$  NMR (500 MHz,  $CDCl_3$ )  $\delta$  = 7.49 (d,  $J$  = 8.1 Hz, 4H), 7.30 (d,  $J$  = 8.0 Hz, 4H), 5.61 (s, 1H), 4.51 – 4.38 (m, 4H), 4.27 (t,  $J$  = 7.4 Hz, 1H), 4.14 – 4.05 (m, 1H), 3.99 (dq,  $J$  = 10.8, 7.1 Hz, 1H), 3.02 (t,  $J$  = 6.8 Hz, 4H), 1.10 (dd,  $J$  = 9.4, 4.9 Hz, 4H), 0.89 – 0.79 (m, 8H).

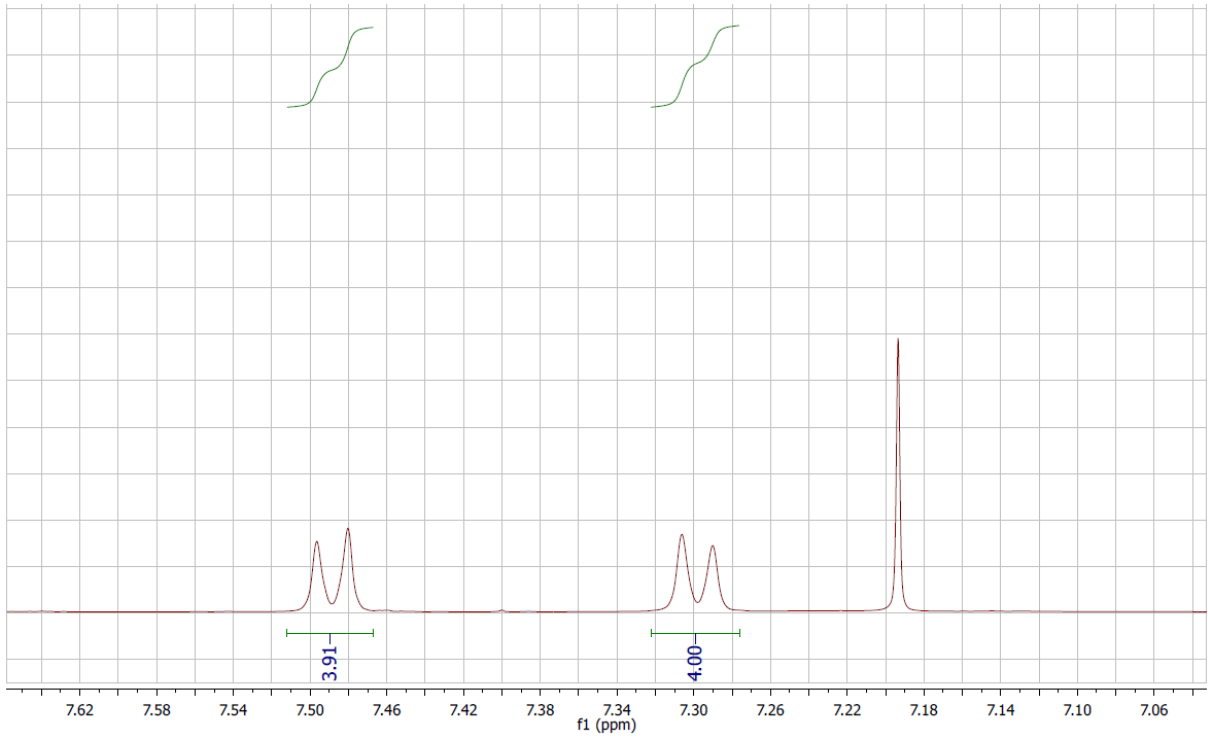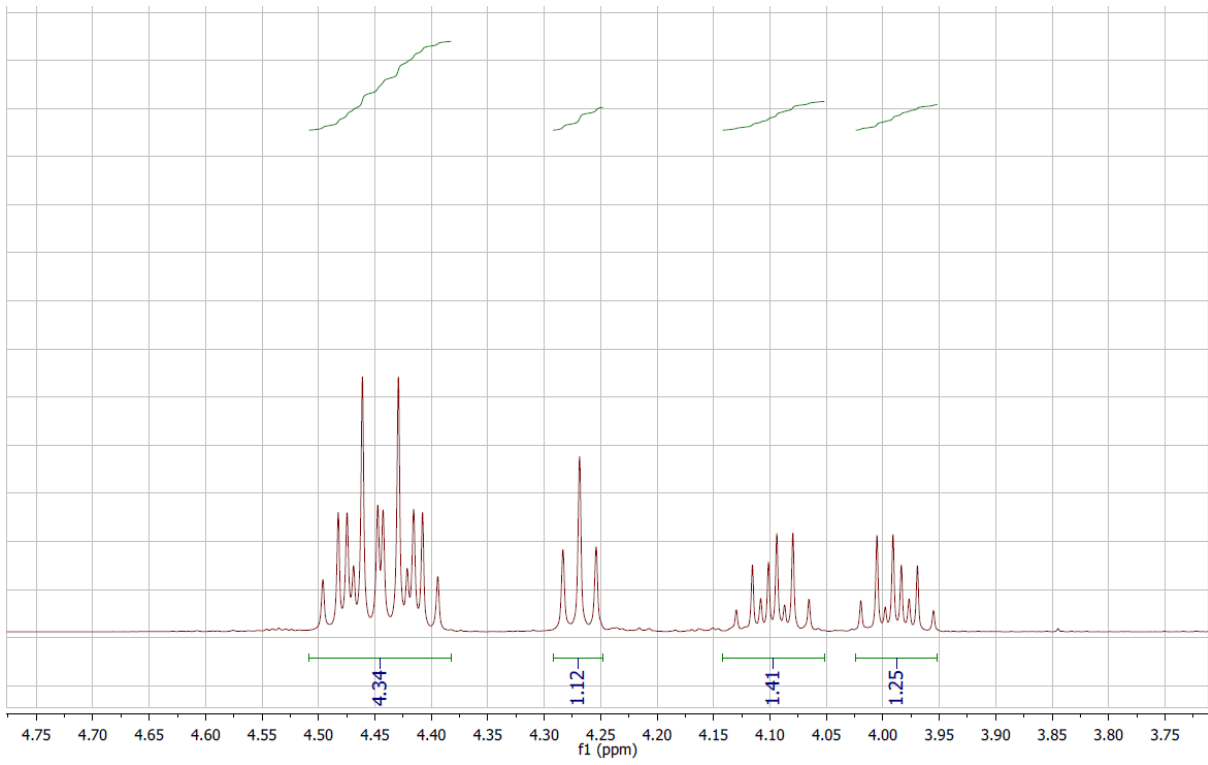

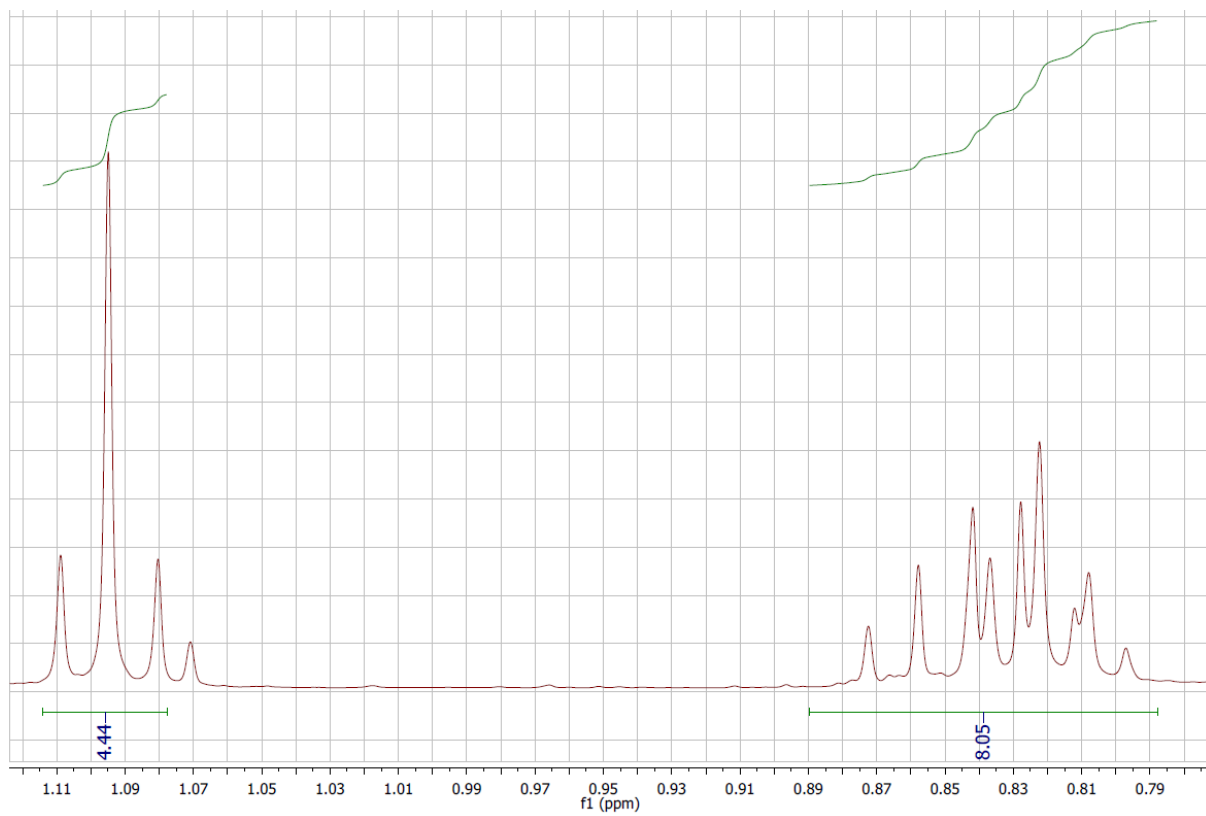

Supplement: 13195_2018_342_MOESM1_ESM.pdf [file 13195_2018_342_MOESM1_ESM.pdf]
